# Supplementary material for: CREB1 is affected by the microRNAs miR-22-3p, miR-26a-5p, miR-27a-3p, and miR-221-3p and correlates with adverse clinicopathological features in renal cell carcinoma
Source: PubMed Central journal article supplement (PMC7162877; doi:10.1038/s41598-020-63403-y), 2020-04-16
Supplement: 41598_2020_63403_MOESM1_ESM.pdf [file 41598_2020_63403_MOESM1_ESM.pdf]

**CREB1 is affected by the microRNAs miR-22-3p, miR-26a-5p, miR-27a-3p, and miR-221-3p and correlates with adverse clinicopathological features in renal cell carcinoma**

Michael Friedrich<sup>1</sup>, Nadine Heimer<sup>1</sup>, Christine Stoehr<sup>2</sup>, André Steven<sup>1</sup>, Sven Wach<sup>3</sup>, Helge Taubert<sup>3</sup>, Arndt Hartmann<sup>2</sup>, Barbara Seliger<sup>1\*</sup>

<sup>1</sup> Institute for Medical Immunology, Martin Luther University Halle-Wittenberg, 06112 Halle (Saale), Germany

<sup>2</sup> Institute of Pathology, University Erlangen-Nürnberg, 91054 Erlangen, Germany

<sup>3</sup> Institute of Urology, University Erlangen-Nürnberg, 91054 Erlangen, Germany

\*Corresponding author:

Prof. Dr. Barbara Seliger  
Martin Luther University Halle-Wittenberg  
Institute for Medical Immunology  
Magdeburger Str. 2  
06110 Halle (Saale)  
Germany

Telephone: (+49) (345) 557 - 1357

Fax: (+49) (345) 557 - 4055

E-mail: [barbara.seliger@uk-halle.de](mailto:barbara.seliger@uk-halle.de)

## Supplementary Data

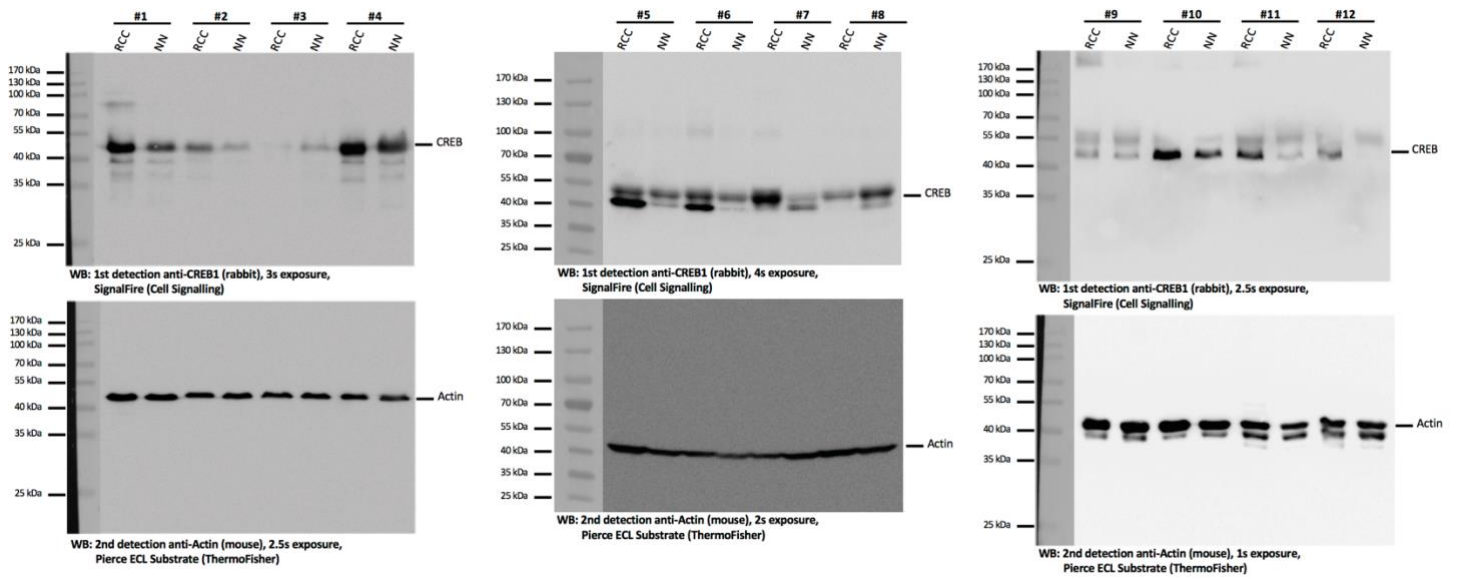

**Supplementary Figure 1:** Western blot-based detection of CREB1 in 12 pairs of ccRCC tumor samples (RCC) and matched adjacent normal tissue (NN). The same blot was re-probed for  $\beta$ -Actin serving as loading control.

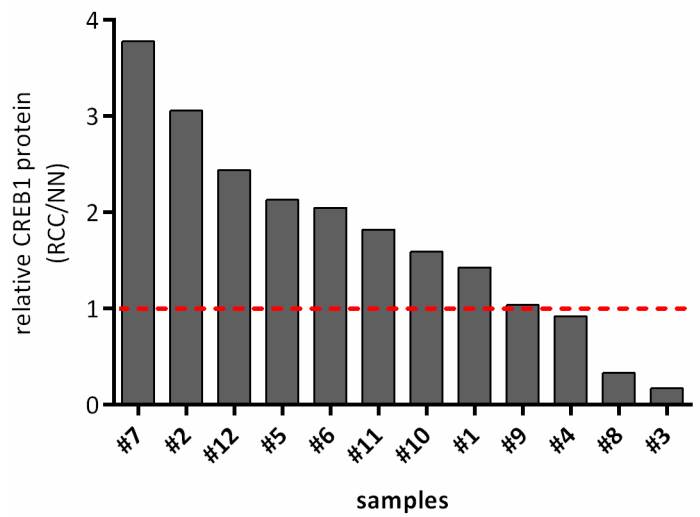

**Supplementary Figure 2:** Relative CREB1 protein quantification in RCC tumor samples and corresponding normal tissue based on the Western blot data shown in Figure 1A using  $\beta$ -Actin for normalization. Values  $>1$  indicate higher CREB1 level in tumor samples, while values  $<1$  indicate higher CREB1 level in corresponding normal tissue.

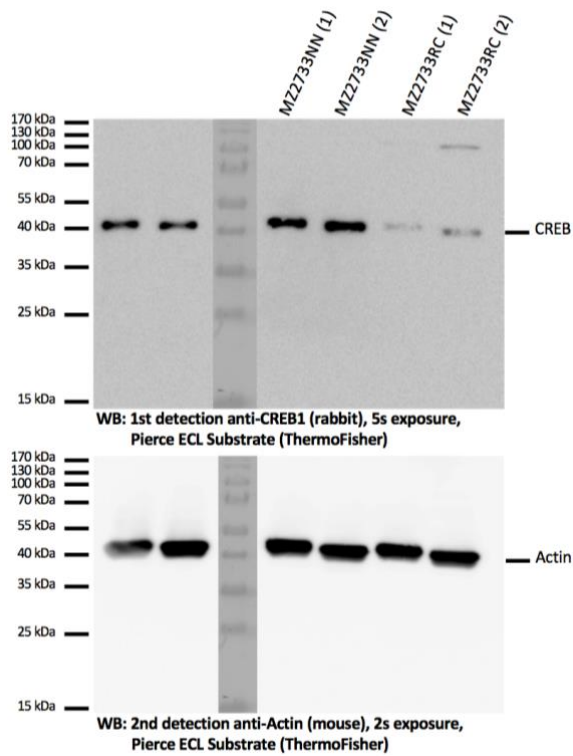

**Supplementary Figure 3:** Western blot-based detection of CREB1 protein in the ccRCC cell line MZ2733RC and the corresponding normal tissue cell line MZ2733NN. Number in parentheses indicates a technical replicate. Same blot was re-probed for  $\beta$ -Actin serving as loading control. Unlabeled lanes belong to an unrelated experiment.

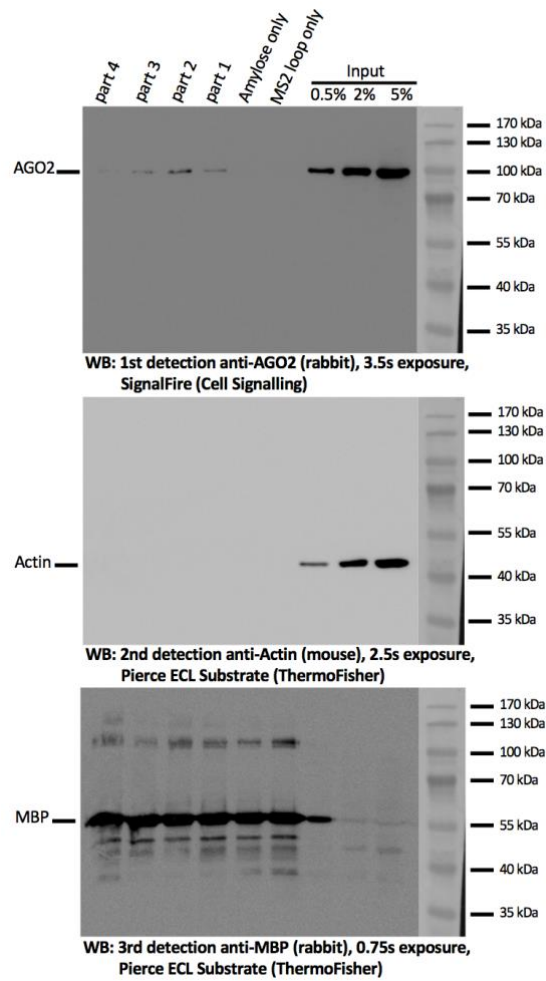

**Supplementary Figure 4:** Western blot-based detection of indicated proteins isolated from the miTRAP input sample (MZ2733RC) or co-precipitated with the used resin (amylose only), 2x MS2 loop RNA (MS2 loop only) or the different parts of the 3'-UTR of CREB1, respectively. Same blot was re-probed for  $\beta$ -Actin serving as negative control to exclude unspecific binding to the different RNAs. Detection of maltose binding protein (MBP) on the same blot ensures equal loading of the resin.

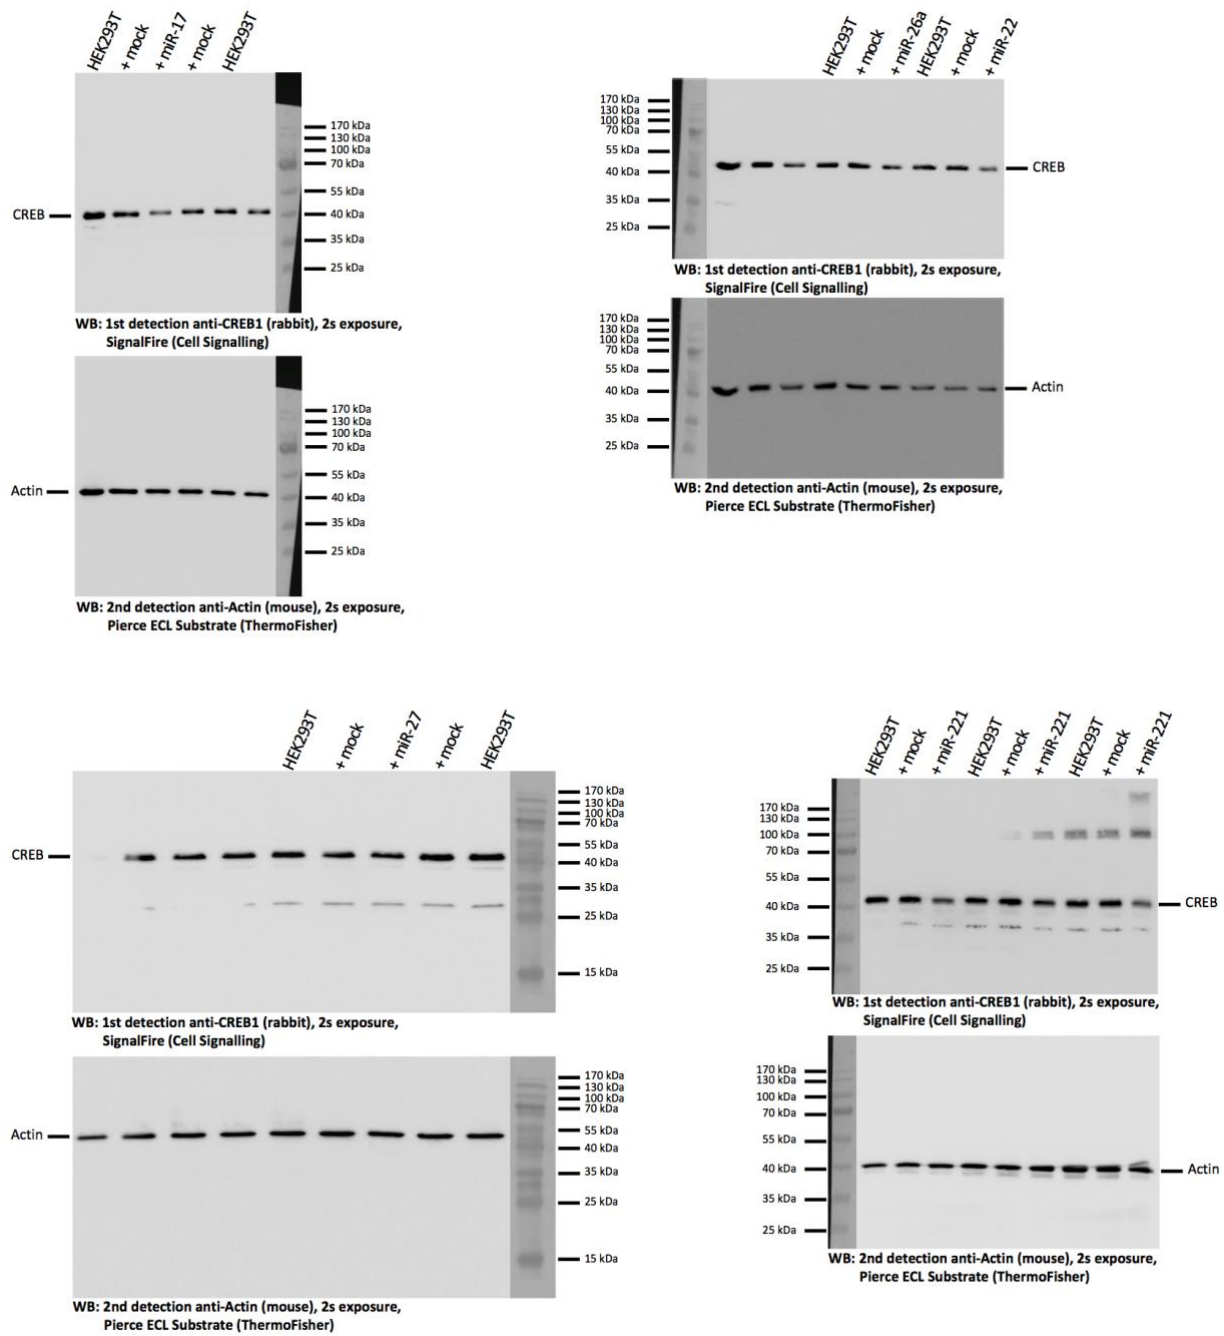

**Supplementary Figure 5:** Western blot-based detection of CREB1 after the miRNA mimic or mock transfection in HEK293T cells was performed as described in Materials and Methods. Same blot was re-probed for  $\beta$ -Actin serving as loading control. Unlabeled lanes belong to an unrelated experiment.

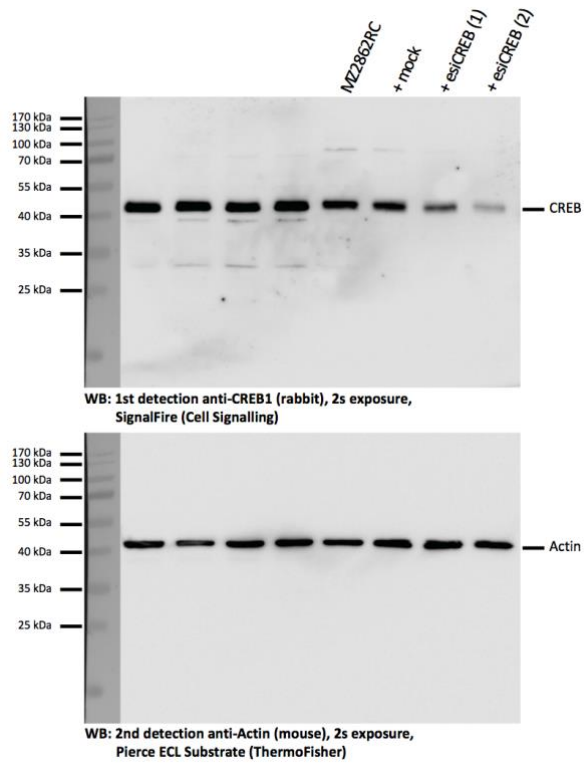

**Supplementary Figure 6:** Western blot-based detection of CREB1 after transfection of esiRNAs specific to CREB1 in MZ2862RC cell line. The number in parentheses indicates a technical replicate. Same blot was re-probed for  $\beta$ -Actin serving as loading control. Unlabeled lanes belong to an unrelated experiment.

**Supplementary Table 1: Results of the Mantel Cox tests for correlation of panCREB1 to overall survival, adjusted for different co-variates.**

| co-variate                    |             | p-value | number of events | number of censored cases |
|-------------------------------|-------------|---------|------------------|--------------------------|
| age at diagnosis              | < 65        | 0.155   | 24               | 133                      |
|                               | ≥ 65        | 0.307   | 68               | 116                      |
|                               | pooled      | 0.106   | 92               | 249                      |
| sex                           | female      | 0.176   | 21               | 96                       |
|                               | male        | 0.413   | 71               | 152                      |
|                               | pooled      | 0.189   | 92               | 248                      |
| morphology                    | clear cell  | 0.234   | 69               | 197                      |
|                               | papillar    | 0.278   | 9                | 22                       |
|                               | chromophobe | 0.747   | 4                | 17                       |
|                               | others      | 0.556   | 8                | 7                        |
|                               | pooled      | 0.100   | 90               | 243                      |
| tumor size pT                 | 1           | 0.050   | 33               | 183                      |
|                               | 2           | 0.099   | 12               | 22                       |
|                               | 3           | 0.620   | 44               | 37                       |
|                               | 4           | n.a.    | 0                | 1                        |
|                               | pooled      | n.a.    | 89               | 243                      |
| lymphovascular invasion (pL1) | 0           | 0.579   | 59               | 164                      |
|                               | 1           | 0.544   | 3                | 6                        |
|                               | pooled      | 0.495   | 62               | 170                      |
| vascular invasion (V1)        | 0           | 0.770   | 39               | 144                      |
|                               | 1           | 0.456   | 16               | 21                       |
|                               | 2           | 0.306   | 13               | 13                       |
|                               | pooled      | 0.739   | 68               | 178                      |
| WHO grade                     | 1           | 0.652   | 4                | 35                       |
|                               | 2           | 0.164   | 45               | 178                      |
|                               | 3           | 0.337   | 43               | 35                       |
|                               | pooled      | 0.880   | 92               | 248                      |



**Supplementary Table 2: Oligonucleotides used in this study**

| name                    | sequence                                              | application                     |
|-------------------------|-------------------------------------------------------|---------------------------------|
| 3'UTR hCREB1 part1 fw   | GGTACCTTTGGGATTTAAATTTTCACCTGTTAAGGT                  | amplification CREB 3'-UTR       |
| 3'UTR hCREB1 part1 rv   | CTCGAGTTTGTGACTTTGCTTGATTTCTGTT                       | amplification CREB 3'-UTR       |
| 3'UTR hCREB1 part2 fw   | GGTACCTTGTGTAACCGCATAGATATGTCA                        | amplification CREB 3'-UTR       |
| 3'UTR hCREB1 part2 rv   | CTCGAGACAAGGTTTGAGCCCGTCTTT                           | amplification CREB 3'-UTR       |
| 3'UTR hCREB1 part3 fw   | GGTACCGCACCTAAAAGCTAGCCTTAAAAAC                       | amplification CREB 3'-UTR       |
| 3'UTR hCREB1 part3 rv   | CTCGAGCAAGGGGACCTGAGAAGGTA                            | amplification CREB 3'-UTR       |
| 3'UTR hCREB1 part4 fw   | GGTACCCACGTGTTCACTGAAAGGACAA                          | amplification CREB 3'-UTR       |
| 3'UTR hCREB1 part4 rv   | CTCGAGGTCTGTGCCACTTCTAATTTTAATTCCA                    | amplification CREB 3'-UTR       |
| MF442_CREB Luc part1_fw | GCTAGCGGGATTTAAATTTTCACCTGTTAAGG                      | cloning CREB 3'-UTR in pmiR-GLO |
| MF443_CREB Luc part1_rv | GTCGACGACTTTGCTTGATTTCTGTTAAACC                       | cloning CREB 3'-UTR in pmiR-GLO |
| MF444_CREB Luc part2_fw | GCTAGCGTGTAAACCGCATAGATATGTC                          | cloning CREB 3'-UTR in pmiR-GLO |
| MF445_CREB Luc part2_rv | GTCGACCTTTTAGGTGCTAAAATATTTTAATC                      | cloning CREB 3'-UTR in pmiR-GLO |
| MF446_CREB Luc part3_fw | GCTAGCGAAGGGAAAATAACTCAAGTGC                          | cloning CREB 3'-UTR in pmiR-GLO |
| MF447_CREB Luc part3_rv | GTCGACGGACCTGAGAAGGTATATAG                            | cloning CREB 3'-UTR in pmiR-GLO |
| MF522_mut.miR26_CREB    | CAGGATAGGCTGTGACTTCAATCTAGATTTCTTTTAATATTTAAC         | mutagenesis miRNA binding site  |
| MF523_mut.miR26_CREB    | GATTACTTGAAGGTTTAAACAAACGTATTTCTTC                    | mutagenesis miRNA binding site  |
| MF524_mut.miR221_CREB   | TGCTGGGTTTCTAAGCCTTTGTATGTGTC                         | mutagenesis miRNA binding site  |
| MF525_mut.miR221_CREB   | GACAATGTAGCTAACTTATCATAAGCAGATGAG                     | mutagenesis miRNA binding site  |
| MF577_mut.miR27_CREB    | TAAGTCCGCGTGAATGTTCCAACACCTG                          | mutagenesis miRNA binding site  |
| MF578_mut.miR27_CREB    | GCCACTGTGAAGTTTAAATGCAAAAGCACAATG                     | mutagenesis miRNA binding site  |
| MF579_mut.miR22_CREB    | TGAAGAACTGTCTGTGGCAGCTATAACAG                         | mutagenesis miRNA binding site  |
| MF580_mut.miR22_CREB    | ACTGGCAGCTTCAAAGCATACAAACCAAATAC                      | mutagenesis miRNA binding site  |
| MF8_Fw_GAPDH            | AGGTCGGAGTCAACGGATT                                   | qRT-PCR                         |
| MF9_Rv_GAPDH            | ATCTCGCTCCTGGAAGATGG                                  | qRT-PCR                         |
| MF416_hCREB_fw          | ACTGTAACGGTGCCAACCTCC                                 | qRT-PCR                         |
| MF417_hCREB_rv          | GAATGGTAGTACCCGGCTGA                                  | qRT-PCR                         |
| MF361_miR-9-5p_fw       | CACGCATCTTTGGTTATCTAGC                                | qRT-PCR                         |
| MF360_miR-9-5p_st       | TCGTATCCAGTGCAGGGTCCGAGGTATTCGCACTGGATACGACT<br>CATAC | cDNA synthesis                  |

| name             | sequence                                                | application    |
|------------------|---------------------------------------------------------|----------------|
| miR-17-5p_qPCR   | GCCCCAAAGTGCTTACAGTG                                    | qRT-PCR        |
| miR-17-5p_STL    | GTCGTATCCAGTGCAGGGTCCGAGGTATTTCGCACTGGATACGAC<br>CTACCT | cDNA synthesis |
| miR-34b-5p_qPCR  | GCCCTAGGCAGTGTCAATAGC                                   | qRT-PCR        |
| miR-34b-5p_STL   | GTCGTATCCAGTGCAGGGTCCGAGGTATTTCGCACTGGATACGAC<br>CAATCA | cDNA synthesis |
| miR-181a-5p_qPCR | GCCCAACATTCAACGCTGTC                                    | qRT-PCR        |
| miR-181a-5p_STL  | TCGTATCCAGTGCAGGGTCCGAGGTATTTCGCACTGGATACGACA<br>CTCAC  | cDNA synthesis |
| miR-181b-5p_qPCR | GCCCAACATTCAATGCTGTC                                    | qRT-PCR        |
| miR-181b-5p_STL  | GTCGTATCCAGTGCAGGGTCCGAGGTATTTCGCACTGGATACGAC<br>ACCCAC | cDNA synthesis |
| miR-200b-3p_qPCR | GCCCTAATACTGCCTGGTAA                                    | qRT-PCR        |
| miR-200b-3p_STL  | GTCGTATCCAGTGCAGGGTCCGAGGTATTTCGCACTGGATACGAC<br>TCATCA | cDNA synthesis |
| miR-222-3p_qPCR  | GCCCAAGCTACATCTGGCTA                                    | qRT-PCR        |
| miR-222-3p_STL   | GTCGTATCCAGTGCAGGGTCCGAGGTATTTCGCACTGGATACGAC<br>ACCCAG | cDNA synthesis |
| miR-22-3p_qPCR   | GCCCAAGCTGCCAGTTGAAG                                    | qRT-PCR        |
| miR-22-3p_STL    | GTCGTATCCAGTGCAGGGTCCGAGGTATTTCGCACTGGATACGAC<br>ACAGTT | cDNA synthesis |
| miR-26a-5p_qPCR  | GCCCTTCAAGTAATCCAGGA                                    | qRT-PCR        |
| miR-26a-5p_STL   | GTCGTATCCAGTGCAGGGTCCGAGGTATTTCGCACTGGATACGAC<br>AGCCTA | cDNA synthesis |
| miR-27a-3p_qPCR  | CACGCATTACAGTGGCTAAG                                    | qRT-PCR        |
| miR-27a-3p_STL   | GTCGTATCCAGTGCAGGGTCCGAGGTATTTCGCACTGGATACGAC<br>GCGGAA | cDNA synthesis |
| miR-30a-5p_qPCR  | GCCCTGTAAACATCCTCGAC                                    | qRT-PCR        |
| miR-30a-5p_STL   | GTCGTATCCAGTGCAGGGTCCGAGGTATTTCGCACTGGATACGAC<br>CTTCCA | cDNA synthesis |
| miR-221-3p_qPCR  | GCCCAGCTACATTGTCTGCTG                                   | qRT-PCR        |
| miR-221-3p_STL   | GTCGTATCCAGTGCAGGGTCCGAGGTATTTCGCACTGGATACGAC<br>GAAACC | cDNA synthesis |
| miR-152-3p_qPCR  | GCCCTCAGTGCATGACAGA                                     | qRT-PCR        |
| miR-152-3p_STL   | GTCGTATCCAGTGCAGGGTCCGAGGTATTTCGCACTGGATACGAC<br>CCAAGT | cDNA synthesis |
| miRNA_rv         | CCAGTGCAGGGTCCGAGGTA                                    | qRT-PCR        |
